# Supplementary material for: Differential effects of Nintedanib and Pirfenidone on lung alveolar epithelial cell function in ex vivo murine and human lung tissue cultures of pulmonary fibrosis
Source: Springer Nature journal article supplement (doi:10.1186/s12931-018-0876-y), 2018-09-15

**A**

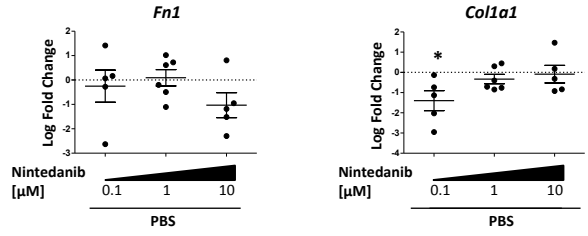

**B**

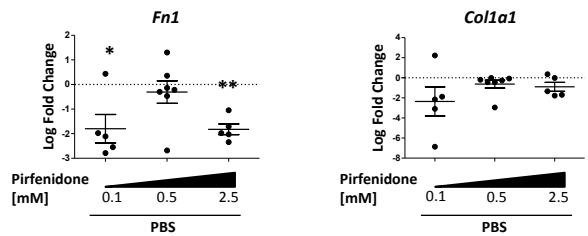

**C**

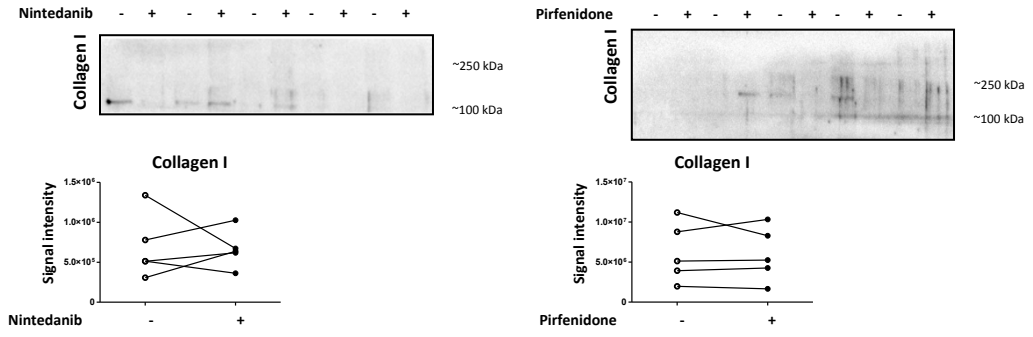

Supplement: MOESM2 [file 16127202]
